# Supplementary material
Source: PubMed Central journal article supplement (PMC4168360)
Supplement: gf021sup_10-1055-s-0031-1280475.pdf [file gf021sup_10-1055-s-0031-1280475.pdf]

# Zertifizierte Brustkrebszentren aus Sicht der Patientinnen: Stärken und Verbesserungspotenziale

## The Patients' View On Accredited Breast Cancer Centers: Strengths and Potential for Improvement

### Autoren

C. Kowalski<sup>1</sup>, S. Wesselmann<sup>2</sup>, R. Kreienberg<sup>3</sup>, H. Schulte<sup>4</sup>, H. Pfaff<sup>1</sup>

### Institute

<sup>1</sup> IMVR – Institut für Medizinsoziologie, Versorgungsforschung und Rehabilitationswissenschaft der Humanwissenschaftlichen Fakultät und der Medizinischen Fakultät der Universität zu Köln, Köln

<sup>2</sup> Deutsche Krebsgesellschaft e. V., Berlin

<sup>3</sup> Universitäts-Frauenklinik, Ulm

<sup>4</sup> Frauenselbsthilfe nach Krebs e. V., Bonn

### Schlüsselwörter

- Epidemiologie
- Krebsregister
- Mammakarzinom

### Key words

- epidemiology
- cancer registry
- breast

### Zusammenfassung

Den nach den Kriterien der Deutschen Krebsgesellschaft e. V. (DKG) zertifizierten Brustkrebszentren wurde im Jahr 2010 angeboten, an einer einheitlichen und für die Häuser kostenlosen Befragung von Patientinnen und Patienten mit primärem Mammakarzinom teilzunehmen. Die Befragung wurde vom Institut für Medizinsoziologie, Versorgungsforschung und Rehabilitationswissenschaft (IMVR) der Humanwissenschaftlichen Fakultät und der Medizinischen Fakultät der Universität zu Köln durchgeführt. Der Einschluss der Patienten erfolgte zwischen März und November 2010. Die Befragung erfolgte postalisch-poststationär. In der Befragung wurde der Kölner Patientinnenfragebogen für Brustkrebs (KPF-BK) eingesetzt. 128 von 195 Brustkrebszentren und 160 von 251 OP-Standorten nahmen an der Patientenbefragung teil. 8226 Patientinnen gaben ihr Einverständnis, an der Befragung teilzunehmen. Insgesamt konnten 7301 Fragebogen in die Auswertung eingeschlossen werden (89% der angeschriebenen Patientinnen). Die Ergebnisse zeigen eine hohe Zufriedenheit der Patientinnen mit der Versorgung in den DKG-zertifizierten Brustkrebszentren, die Ziele und Inhalte des Zertifizierungssystems werden im Sinne der Patientinnen umgesetzt. Bei einer insgesamt sehr guten Bewertung der Versorgung werden jedoch auch Verbesserungspotenziale für einige der in der Befragung erhobenen Aspekte ersichtlich. Zutage treten zudem teilweise deutliche Unterschiede zwischen den Brustkrebszentren.

### Abstract

Breast Care Centers that were accredited according to the German Cancer Society criteria were offered to participate in a standardized patient survey in 2010, which was conducted by the Institute for Medical Sociology, Health Services Research and Rehabilitation Science, Faculty of Human Science and Faculty of Medicine, University of Cologne. Patients were included consecutively between March and November 2010. The Cologne Patient Questionnaire-Breast Cancer (CPQ-BC) was used, which assesses a number of aspects of hospital care as perceived by the patients, among them provider-patient interaction, the disease-specific information provided, the quality of organization, and room amenities. 128 of 195 Breast Care Centers and 160 of 251 hospitals participated in the study. 8226 patients consented to the survey. The questionnaires of 7301 patients could be included in the analyses (89%). Overall, the results showed that patients are satisfied with their hospital stay and that the accreditation criteria are implemented in a way that serves the patients. However, there is room for improvement for a number of issues, for example with regard to the provision of information and patient involvement in decision making. In addition, for a number of indicators substantial differences were found between the hospitals. The results of the survey provide information on the breast centers' development and can be used by the centers' surgery locations for benchmarking purposes, to identify strengths and weaknesses, and to take actions.

eingereicht 18. 11. 2011

revidiert 25. 11. 2011

akzeptiert 6. 12. 2011

### Bibliografie

DOI <http://dx.doi.org/10.1055/s-0031-1280475>  
 Geburtsh Frauenheilk 2012; 72  
 © Georg Thieme Verlag KG  
 Stuttgart · New York ·  
 ISSN 0016-5751

### Korrespondenzadresse

**Dr. Christoph Kowalski**  
 IMVR – Institut für Medizinsoziologie, Versorgungsforschung und Rehabilitationswissenschaft der Humanwissenschaftlichen Fakultät und der Medizinischen Fakultät der Universität zu Köln  
 Eupener Straße 129  
 50933 Koeln  
 christoph.kowalski@uk-koeln.de

### Einleitung

Den nach den Kriterien der Deutschen Krebsgesellschaft e. V. (DKG) zertifizierten Brustkrebszentren wurde im Jahr 2010 angeboten, an einer

Befragung von Patientinnen und Patienten<sup>1</sup> mit primärem Mammakarzinom teilzunehmen. Diese Befragung wurde vom Institut für Medizinsoziologie, Versorgungsforschung und Rehabilitationswissenschaft (IMVR) der Humanwissenschaft-

lichen Fakultät und der Medizinischen Fakultät der Universität zu Köln durchgeführt. Ziel der Befragung war es, mittels häuserübergreifend einheitlichem Fragebogen und Befragungsdesign für möglichst viele Brustkrebszentren miteinander vergleichbare Daten zu erhalten und so die Gegenüberstellung der Ergebnisse der Häuser untereinander zu ermöglichen, beispielsweise zum Zwecke des Benchmarkings. Die Abwicklung der Befragung und das Befragungsinstrument sind weitgehend mit der seit 2006 in den nach den Kriterien des Landes Nordrhein-Westfalen zertifizierten Brustzentren durchgeführten Patientinnenbefragung identisch. Zum Einsatz kam der „Kölner Patientinnenfragebogen für Brustkrebs“ (KPF-BK), der eine Vielzahl von Teilbereichen der Versorgung im Krankenhaus erhebt und daneben auch die gesundheitsbezogene Lebensqualität misst. Klinische und Behandlungsdaten wurden vom Krankenhauspersonal ergänzt [1]. Die hier vorgestellte Befragung war für die teilnehmenden Häuser kostenlos. Ein Vorteil für die Kliniken war, dass mit der Teilnahme an der Befragung eine Anforderung zur (Re-)Zertifizierung erfüllt wurde. Knapp zwei Drittel der DKG-zertifizierten Brustkrebszentren nahmen an der Befragung teil. In diesem Beitrag werden die Durchführung der Befragung, der Fragebogen und ausgewählte Ergebnisse vorgestellt.

## Material und Methodik

Das Angebot zur Teilnahme an der Befragung richtete sich an alle von der DKG zertifizierten Brustkrebszentren. Da die Brustkrebszentren aus Nordrhein-Westfalen, die zugleich nach den Kriterien des Landes NRW zertifiziert sind, im gleichen Zeitraum an der für diese Zentren verpflichtenden Befragung teilnahmen, wurde diesen das Angebot zur Teilnahme an der hier beschriebenen Befragung nicht gemacht. Allen eingeschlossenen Brustkrebszentren mit allen Operationsstandorten wurden Informationen zur Befragung und alle für die Befragung erforderlichen Unterlagen zugesandt. Die im Befragungszeitraum operierten Patientinnen waren kurz vor der Entlassung nach ihrem Einverständnis zur Teilnahme an der Studie zu fragen. Die Einschlusskriterien waren im Einzelnen: Operation während des aktuellen Krankenhausaufenthalts, Erstdiagnose, d.h. kein Lokalrezidiv, Entlassung im Erhebungszeitraum: 22. März bis 30. November 2010, mindestens 1 maligner Befund, mindestens 1 postoperative Histologie mit Mammakarzinom, ICD-Code der gesicherten Diagnose: C50.x oder D05.x. Das Einverständnis der Patientinnen vorausgesetzt, übermittelten die Krankenhäuser die klinischen Indikatoren (darunter Grading, Tumorgöße, Nodalstatus, Metastasen, Art der Operation) und die Adressen 1-mal wöchentlich an das IMVR, das die Fragebogen dann an die Patientinnen verschickte. Der Aufwand für die teilnehmenden Brustkrebszentren war damit überschaubar. Die Befragung erfolgte dann postalisch-poststationär in Anlehnung an die „Total Design Method“ [2] mit einem Erstanschreiben inkl. portofreiem Rückumschlag und 2 Erinnerungsschreiben<sup>2</sup>.

In der Befragung wurde der Kölner Patientinnenfragebogen für Brustkrebs (KPF-BK) eingesetzt. Dieser ist modular aufgebaut

und misst mit über 60 Kennzahlen eine Fülle von Teilleistungsdimensionen der stationären Versorgung, darunter beispielsweise die Aufnahmeabwicklung, die von der Patientin wahrgenommene Interaktion mit dem Personal, die Qualität der Hotelleistungen, die Qualität der zur Verfügung gestellten Informationen zur Behandlung und zur psychosozialen Unterstützung sowie die allgemeine Zufriedenheit. Ergänzend werden die gesundheitsbezogene Lebensqualität mit den Modulen der EORTC und zahlreiche soziodemografische Angaben der Patientinnen erfasst.

In den meisten Fällen werden die Items der verschiedenen Kennzahlen im KPF-BK nach Faktorenanalyse und Reliabilitätstests zu einer Skala (Indikator) aufsummiert und anschließend durch die Anzahl der Items dividiert. Die Items sind so codiert, dass der Ablehnung einer Aussage niedrige Werte und der Zustimmung hohe Werte zugeordnet werden (z.B. „stimme überhaupt nicht zu“ = 1 Punkt bzw. „stimme voll und ganz zu“ = 4 Punkte). Die Wertebereiche der Indikatoren liegen in den meisten Fällen zwischen 1 und 4. Die Indikatorennamen sind so gewählt, dass ein hoher Wert eine Übereinstimmung mit der inhaltlichen Bedeutung des Namens und ein niedriger Wert einer Nichtzustimmung dieser Bedeutung entspricht. So drückt ein hoher Wert im Beispiel „Unterstützung durch Ärzte“ aus, dass sich die Patientinnen während des Krankenhausaufenthalts gut durch die Ärztinnen und Ärzte unterstützt fühlten. Die auf diese Weise gebildeten 22 Indikatoren werden im 1. Teil des Ergebnisberichts dargestellt. Im Anschluss folgt die Darstellung der Einzelitems. Der vollständige Bericht ist auf den Webseiten von DKG und IMVR einzusehen<sup>3</sup>. In diesem Beitrag werden ausgewählte Ergebnisse präsentiert.

## Ergebnisse

128 von 195 von der DKG zertifizierte Brustkrebszentren und 160 von 251 OP-Standorten nahmen an der Patientenbefragung teil. 8226 der 9354 Patientinnen, die in den Krankenhäusern nach ihrem Einverständnis gefragt wurden, waren bereit, an der Befragung teilzunehmen (● Abb. 1). Allen 8226 Patientinnen, die der Befragung zugestimmt hatten, wurde ein Fragebogen zugeschickt. Insgesamt gingen von 7405 der angeschriebenen Patientinnen Rückmeldungen ein. Aus unterschiedlichen Gründen konnten 87 Patientinnen nicht an der Befragung teilnehmen<sup>4</sup>. Von den angeschriebenen Patientinnen sendeten 7318 einen ausgefüllten Fragebogen zurück. 17 Fragebogen konnten nicht in die Auswertung einfließen, da bei ihnen nur 30% oder weniger aller Fragen beantwortet wurden. Somit wurden insgesamt 7301 Fragebogen in die Auswertung eingeschlossen: Von 88,76% der angeschriebenen Patientinnen lagen damit auswertbare Fragebogen vor. Die Anzahl der ausgefüllten und verwertbaren Fragebogen, die aus den einzelnen Brustkrebszentren vorlagen, variierte von 1 bis 166. Zur Wahrung der Anonymität der Befragten wurden die Ergebnisse nur für Zentren berichtet, aus denen mindestens 6 auswertbare Fragebogen vorlagen.

<sup>1</sup> In die Befragung eingeschlossen wurden Patientinnen und Patienten. Da mehrheitlich Frauen befragt wurden, wird im Folgenden stets die weibliche Form „Patientinnen“ verwendet. Auch für insgesamt 32 Männer lagen auswertbare Fragebogen vor.

<sup>2</sup> Für eine ausführlichere Beschreibung der Befragungsdurchführung s. [3].

<sup>3</sup> <http://www.imvr.uni-koeln.de/uploads/Ergebnisbericht%20DKG%20Patientenbefragung%202010.pdf>;  
[http://www.krebsgesellschaft.de/wub\\_zertifizierte\\_zentren\\_aktuelles,200746.html](http://www.krebsgesellschaft.de/wub_zertifizierte_zentren_aktuelles,200746.html)

<sup>4</sup> Gründe hierfür waren z.B.: falscher Einschluss in die Befragung, schlechter Gesundheitszustand, sprachliche Gründe, Patientinnen waren verstorben.

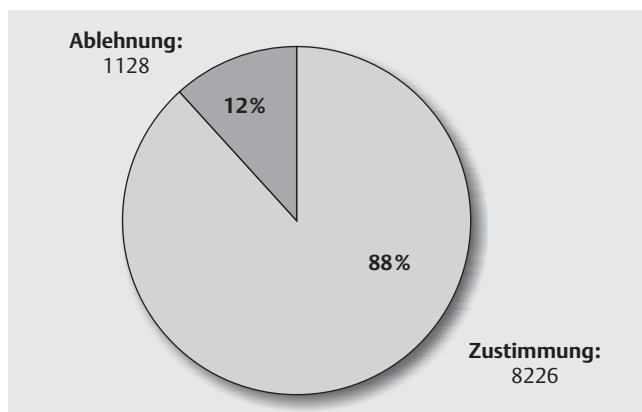

**Abb. 1** Einverständniserklärungen: Zustimmungen und Ablehnungen zur Befragung.

Der hohe Rücklauf und die sehr zufriedenstellende Teilnahmequote der Krankenhäuser sprechen für eine hohe Repräsentativität der Stichprobe für das einzuschließende Kollektiv. Die Ergebnisse zum Alter der Befragten und zur Art der Operation bestätigen dies (► **Tab. 1** und **2**).

Die Befragungsdaten wurden für die teilnehmenden Brustkrebszentren in Form eines Ergebnisberichts aufbereitet. In diesem wurden die Ergebnisse aller Indikatoren über die Brustzentren vergleichend dargestellt. Die Darstellung erfolgt dabei in pseudonymisierter Form: die Brustkrebszentren sind über eine Nummer zu identifizieren, die lediglich dem betreffenden Brustkrebszentrum vorliegt. So können die Zentren den eigenen Wert mit dem der anderen Zentren vergleichen, ohne dass ihre Identität für andere ersichtlich wäre. Der Bericht ist der Öffentlichkeit zum Download zugänglich, nicht jedoch die Identifikationsnummern. Die Ergebnisse dienen dem Vergleich der Brustkrebszentren untereinander, der Analyse von Stärken und Schwächen sowie

**Tab. 1** Altersverteilung der Patientinnen in % (n).

| Alter in Gruppen   | %           | n     |
|--------------------|-------------|-------|
| 18 bis 29 Jahre    | 0,5         | 38    |
| 30 bis 39 Jahre    | 3,5         | 250   |
| 40 bis 49 Jahre    | 17,4        | 1 256 |
| 50 bis 59 Jahre    | 27,3        | 1 976 |
| 60 bis 69 Jahre    | <b>29,6</b> | 2 143 |
| 70 bis 79 Jahre    | 17,3        | 1 252 |
| 80 Jahre und älter | 4,4         | 319   |
| gesamt             | 100         | 7 234 |
| keine Angabe       |             | 67    |

**Tab. 2** Art der Operation (Angaben des Krankenhauspersonals) in % (n).

| Art der OP                              | %           | n     |
|-----------------------------------------|-------------|-------|
| Mastektomie ohne direkte Rekonstruktion | 20,1        | 1 379 |
| Mastektomie mit direkter Rekonstruktion | 4,8         | 326   |
| brusterhaltende Therapie                | <b>74,5</b> | 5 115 |
| sonstige Angaben                        | 0,6         | 43    |
| gesamt                                  | 100         | 6 863 |
| keine Angabe                            |             | 438   |

als Ausgangspunkt für Verbesserungsmaßnahmen im Sinne der Realisierung des Idealbilds des „lernenden Krankenhauses“ [3]. Insgesamt zeigen die Ergebnisse eine hohe Zufriedenheit der Patientinnen mit der Versorgung in den DKG-zertifizierten Brustkrebszentren. Beispielsweise äußern sich nur wenige Patientinnen in Bezug auf die medizinische Behandlung und die Sauberkeit unzufrieden. Auch das Vertrauen in Ärztinnen und Ärzte und Pflegekräfte ist ausgesprochen hoch. Es zeigen sich jedoch auch deutliche Verbesserungspotenziale, beispielsweise bei der Bereitstellung von Informationen und bei der Einbeziehung der Patientinnen in die Behandlung. Zudem gibt es zum Teil eindeutige Unterschiede zwischen den Brustkrebszentren.

Exemplarisch werden an dieser Stelle ausgewählte Ergebnisse der Befragung zu den Themen *Entscheidung für das Brustkrebszentrum*, *Unterstützung durch Ärzte und Pflegekräfte*, *Bereitstellung von Informationen* und *Selbsthilfe* vorgestellt. Zudem werden regionale Unterschiede untersucht.

### Entscheidung für das Brustkrebszentrum

Gefragt nach den Gründen für die Entscheidung zugunsten des behandelnden Brustkrebszentrums nannten die Patientinnen am häufigsten eine erhaltene Empfehlung, den guten Ruf des Brustkrebszentrums, die Nähe zum Wohnort sowie die Zertifizierung. Auch der Ruf eines Arztes wurde noch von ca. einem Drittel der Patientinnen genannt (► **Tab. 3**).

Zu dem am häufigsten genannten Grund „Empfehlung“ steht im KPF-BK eine Frage zur Person, von der die Empfehlung gegeben wurde, zur Verfügung. Mit großem Abstand am häufigsten genannt wurde der Frauenarzt als Empfehlungsgeber (59,4%), bei immerhin noch knapp 12% aller Patientinnen sprachen Verwandte/Bekannte eine Empfehlung aus.

### Unterstützung durch Ärztinnen/Ärzte und Pflegekräfte

Das Ausmaß an „Unterstützung durch Ärzte“ wurde über 3 Items erfasst (► **Tab. 4**). Die einzelnen Fragen sind sowohl für sich allein betrachtet interpretierbar als auch als Index nach der Skalenebildung. Es zeigt sich eine insgesamt hohe patientenseitig wahrgenommene Unterstützung durch die Ärztinnen und Ärzte. Es ergibt sich ein Gesamtmittelwert von 3,53 auf einer Skala von 1 bis 4. Zwischen den Brustkrebszentren gibt es deutliche Unterschiede. So reichen die Mittelwerte pro Zentrum von 3,07 bis 3,85.

**Tab. 3** Entscheidungsfaktoren für die Brustzentrumsauswahl (angekreuzt in % und n).

| Welche Faktoren haben die Entscheidung für das Brustzentrum maßgeblich beeinflusst? (Mehrfachnennungen möglich) | %           | n     |
|-----------------------------------------------------------------------------------------------------------------|-------------|-------|
| Nähe zum Wohnort                                                                                                | 43,2        | 3 156 |
| Empfehlung                                                                                                      | <b>45,7</b> | 3 335 |
| Zertifizierung (= Qualitätssiegel) als Brustzentrum                                                             | 35,8        | 2 616 |
| guter Ruf des Brustzentrums                                                                                     | 43,6        | 3 186 |
| spezielle Behandlungsmöglichkeiten                                                                              | 11,0        | 806   |
| guter Ruf eines Arztes im Brustzentrum                                                                          | 31,2        | 2 281 |
| gute eigene Erfahrungen mit dem Krankenhaus                                                                     | 17,4        | 1 267 |
| Informationen, die ich im Internet gefunden habe.                                                               | 4,8         | 351   |
| sonstiges                                                                                                       | 3,6         | 265   |
| bei keiner Antwortkategorie ein Kreuz gemacht                                                                   |             | 61    |

**Tab. 4** Unterstützung durch Ärzte, Items der Skala in % (n).

| Was ist Ihre Meinung zu den Ärzten/Ärztinnen auf der Station?                            | Nichtzustimmung<br>(1, 2)<br>% (n) | Zustimmung<br>(3, 4)<br>% (n) | keine Angabe<br>n |
|------------------------------------------------------------------------------------------|------------------------------------|-------------------------------|-------------------|
| Ich konnte mich auf die Ärzte verlassen, wenn ich Probleme mit meiner Krankheit hatte.   | 4,9 (346)                          | 95,1 (6 753)                  | 202               |
| Die Ärzte unterstützten mich so, dass mir der Umgang mit meiner Krankheit leichter fiel. | 10,8 (769)                         | 89,2 (6 354)                  | 178               |
| Die Ärzte waren bereit, sich meine Probleme im Zusammenhang mit der Krankheit anzuhören. | 9,7 (691)                          | 90,3 (6 415)                  | 195               |

Vergleichbare Ergebnisse lassen sich für den Indikator „Unterstützung durch Pflegekräfte“ finden. Bei einem Gesamtmittelwert von 3,58 reichen die Mittelwerte der Zentren von 3,13 bis 3,87. Die Ergebnisse der Items sind in **Tab. 5** dargestellt.

### Informationen

Während die personalbezogenen Indikatoren (Unterstützung und Vertrauen in Ärztinnen/Ärzte und Pflegepersonal) ebenso wie die Indikatoren zur Zimmerqualität (z.B. Sauberkeit, Zimmerausstattung) insgesamt gute Ergebnisse liefern, wird hinsichtlich des Informationsumfangs und der Art und Weise der Informationsvermittlung Verbesserungspotenzial deutlich. Beispielhaft ist dies hier für den Indikator „Empathische Informationsvermittlung“ und das nach der Entlassung verbliebene Aufklärungsbedürfnis, den „Psychosozialen Informationsbedarf“, dargestellt.

Bei den 5 Items zur empathischen Informationsvermittlung durch den Arzt (**Tab. 6**) äußerten sich weniger Patientinnen zustimmend als bei den Fragen zur Unterstützung durch das ärztliche Personal. Der Skalenmittelwert über alle Patientinnen liegt bei 3,40, der beste erreichte Wert für ein Brustzentrum beträgt 3,69, der schlechteste 3,04. Die Ergebnisse zum Indikator „Psychosozialer Informationsbedarf“ zeigen auf, zu welchen Themen sich die Patientinnen mehr Informationen gewünscht hätten (**Tab. 7**). Wenn sich Patientinnen zusätzliche Informationen gewünscht haben, dann zumeist zu den auf die Behandlung folgenden körperlichen und nervlichen Belastungen im Alltag (36%) und zu gesundheitsfördernden Maßnahmen (39%). Offen bleibt an dieser Stelle indes, wie dieser Informationsbedarf gedeckt

werden kann. Die vergleichsweise geringe Zahl von Patientinnen, die sich mehr Informationen zu Büchern und Broschüren gewünscht hätten, lässt vermuten, dass sich Patientinnen lieber aus „persönlichen Quellen“, z.B. dem Krankenhauspersonal, informiert sehen würden. Hier kommen nicht nur die Ärztinnen und Ärzte infrage, sondern auch das (weiter-)qualifizierte Pflegepersonal.

### Selbsthilfe

Wie aus **Tab. 7** zu entnehmen ist, gaben 80% der Patientinnen an, dass sie sich nicht mehr Informationen über Selbsthilfegruppen gewünscht hätten. Für viele Patientinnen sind Selbsthilfegruppen von großer Bedeutung, wenn Unterstützung während und nach dem Krankenhausaufenthalt gefordert ist. Der KPF-BK wurde in Zusammenarbeit mit Selbsthilfegruppen und anderen Akteuren entwickelt und erfasst daher auch den Kontakt zu und die Information über Selbsthilfegruppen mit 2 Fragen, die in **Tab. 8** dargestellt sind.

Die Mehrheit der Patientinnen gab an, im Krankenhaus über Selbsthilfegruppen informiert worden zu sein, weitere 15% hatten kein Interesse an Informationen. 28,5% der Patientinnen allerdings wurden nicht informiert. Dieser Anteil schwankt erheblich über die Brustzentren. Im besten Brustzentrum gab keine Patientin an, nicht über Selbsthilfegruppen informiert worden zu sein, in den 6 schlechtesten lag dieser Anteil jedoch bei über 60% (Ergebnisse nicht dargestellt). Knapp 7% der Patientinnen hatten zusätzlich bereits während des Krankenhausaufenthalts Kontakt zu Selbsthilfegruppen, ein Fünftel hatte daran kein Interesse. 73% hatten keinen Kontakt. Auch der Anteil dieser Patientinnen

**Tab. 5** Unterstützung durch Pflegekräfte, Items der Skala in % (n).

| Was ist Ihre Meinung zu den Pflegekräften auf der Station?                                      | Nichtzustimmung<br>(1, 2)<br>% (n) | Zustimmung<br>(3, 4)<br>% (n) | keine Angabe<br>n |
|-------------------------------------------------------------------------------------------------|------------------------------------|-------------------------------|-------------------|
| Ich konnte mich auf die Pflegekräfte verlassen, wenn ich Probleme mit meiner Krankheit hatte.   | 3,6 (257)                          | 96,4 (6 865)                  | 179               |
| Die Pflegekräfte unterstützten mich so, dass mir der Umgang mit meiner Krankheit leichter fiel. | 6,3 (447)                          | 93,7 (6 680)                  | 174               |
| Die Pflegekräfte waren bereit, sich meine Probleme im Zusammenhang mit der Krankheit anzuhören. | 10,1 (715)                         | 89,9 (6 358)                  | 228               |

**Tab. 6** Empathische Informationsvermittlung, Items der Skala in % (n).

| Die Ärzte/Ärztinnen auf der Station...                           | Nichtzustimmung<br>(1, 2)<br>% (n) | Zustimmung<br>(3, 4)<br>% (n) | keine Angabe<br>n |
|------------------------------------------------------------------|------------------------------------|-------------------------------|-------------------|
| ... teilten mir die Diagnose Brustkrebs einfühlsam mit.          | 15,4 (1 070)                       | 84,6 (5 903)                  | 328               |
| ... erläuterten mir die weiteren Behandlungsschritte feinfühlig. | 14,4 (1 020)                       | 85,6 (6 074)                  | 207               |
| ... erläuterten mir die Eingriffe ausführlich.                   | 12,2 (868)                         | 87,8 (6 262)                  | 171               |
| ... erläuterten mir die Eingriffe verständlich.                  | 10,6 (758)                         | 89,4 (6 365)                  | 178               |
| ... gaben mir ausreichend Bedenkzeit.                            | 16,1 (1 121)                       | 83,9 (5 825)                  | 355               |

**Tab. 7** Psychosozialer Informationsbedarf, Items der Skala in % (n).

| Hätten Sie sich...                                                                            | nein (1)<br>% (n) | ja (2)<br>% (n) | weiß nicht<br>% (n) | keine Angabe<br>n |
|-----------------------------------------------------------------------------------------------|-------------------|-----------------|---------------------|-------------------|
| ... mehr Information über gesunde Lebensführung (Ernährung, Alkohol, Rauchen etc.) gewünscht? | 70,0 (5 019)      | 24,2 (1 733)    | 5,8 (414)           | 135               |
| ... mehr Information über körperliche und nervliche Belastungen im Alltag gewünscht?          | 57,6 (4 117)      | 36,0 (2 569)    | 6,4 (459)           | 156               |
| ... mehr Information über Selbsthilfegruppen gewünscht?                                       | 80,0 (5 711)      | 13,6 (969)      | 6,4 (457)           | 164               |
| ... mehr Information zu Büchern und Broschüren über Ihre Erkrankung gewünscht?                | 83,2 (5 945)      | 12,1 (867)      | 4,6 (330)           | 159               |
| ... mehr Information über gesundheitsfördernde Maßnahmen gewünscht?                           | 55,8 (3 972)      | 39,0 (2 778)    | 5,2 (372)           | 179               |
| ... mehr Information über Hilfe und Betreuung für Zuhause gewünscht?                          | 72,7 (5 170)      | 19,3 (1 369)    | 8,0 (568)           | 194               |

**Tab. 8** Information und Kontakt mit Selbsthilfegruppen in % (n).

| Was ist Ihre Meinung?                                                         | nein<br>% (n) | ja<br>% (n)  | wollte nicht<br>% (n) | keine Angabe<br>n |
|-------------------------------------------------------------------------------|---------------|--------------|-----------------------|-------------------|
| Hat man Sie im Krankenhaus über Selbsthilfegruppen informiert?                | 28,5 (2 047)  | 56,3 (4 042) | 15,2 (1 092)          | 120               |
| Hatten Sie während des Krankenhausaufenthalts Kontakt mit Selbsthilfegruppen? | 73,0 (5 184)  | 6,9 (488)    | 20,2 (1 433)          | 196               |

schwankt erheblich über die Brustkrebszentren hinweg (Minimum: 34%, Maximum: 93%).

### Regionale Unterschiede

Die vorgestellte Befragung ermöglicht den Vergleich der Bewertungen von Mammakarzinompatientinnen für das gesamte Bundesgebiet, daher werden zum Abschluss regionale Unterschiede für ausgewählte Indikatoren betrachtet. Für die in **Tab. 9** dargestellten Ergebnisse werden die Bundesländer in Gruppen zusammengefasst, für die auswertbare Ergebnisse von zusammen mindestens 4 Zentren vorlagen. In der Tabelle werden die Mittelwerte der Zentrenmittelwerte der Indikatoren „Aufnahmeabwicklung“, „Kundenfreundliche Infrastruktur“, „Unterstützung durch Ärzte“, „Unterstützung durch Pflege“ sowie die „Empathische Informationsvermittlung“ für die 121 deutschen Brustkrebszentren dargestellt, für die auswertbare Zahlen vorlagen. Hierbei ist zu beachten, dass diese Unterschiede auch mit regionalen Besonderheiten der Befragten zusammenhängen können, Patientinnen aus bestimmten Regionen beispielsweise höhere Erwartungen an die Versorgung haben könnten, während Patientinnen in anderen Teilen Deutschlands leichter zufriedenzustellen sind. Die Ergebnisse deuten jedoch nicht darauf hin, da dann

für die Regionen ähnliche Tendenzen für alle Indikatoren zu erwarten gewesen wären. Beispielsweise hat Brandenburg/Mecklenburg-Vorpommern die besten Werte bei der kundenfreundlichen Infrastruktur und der Unterstützung durch Ärzte vorzuweisen, zugleich aber die schlechtesten bei der Aufnahmeabwicklung. Insgesamt zeigen sich nur geringe regionale Unterschiede mit einer leichten Tendenz zu insgesamt besseren Ergebnissen in den ostdeutschen Flächenländern.

### Diskussion

▼ Mit über 7000 teilnehmenden Patientinnen und 160 teilnehmenden Krankenhäusern ist die vorgestellte Studie eine der größten auf Brustkrebspatientinnen zugeschnittenen Befragungen in Europa. Für die Beurteilung der Ergebnisse ist es zunächst wichtig, die Voraussetzungen eines zertifizierten Zentrums zu betrachten. Entsprechend der Definition des Nationalen Krebsplans sind zertifizierte Zentren „ein Netz von qualifizierten und gemeinsam zertifizierten, interdisziplinären und transektoralen [...] Einrichtungen, die [...] möglichst die gesamte Versorgungskette für Betroffene abbilden [...]“ [4]. Das bedeutet, mit der Zer-

**Tab. 9** Regionale Unterschiede Skalenergebnisse: Mittelwerte der Zentrenmittelwerte nach Regionen (Zahl der berücksichtigten Brustkrebszentren).

|                                        | Aufnahmeabwicklung | kundenfreundliche Infrastruktur | Unterstützung durch Ärzte | Unterstützung durch Pflegekräfte | empathische Informationsvermittlung |
|----------------------------------------|--------------------|---------------------------------|---------------------------|----------------------------------|-------------------------------------|
| Baden-Württemberg (23)                 | 3,66               | 3,55                            | 3,47                      | 3,52                             | 3,38                                |
| Bayern (26)                            | 3,61               | 3,46                            | 3,50                      | 3,56                             | 3,37                                |
| Berlin (6)                             | 3,60               | 3,35                            | 3,44                      | 3,53                             | 3,40                                |
| Brandenburg/Mecklenburg-Vorpommern (4) | 3,42               | 3,63                            | 3,67                      | 3,63                             | 3,42                                |
| Hessen (13)                            | 3,46               | 3,46                            | 3,44                      | 3,42                             | 3,31                                |
| Niedersachsen/Bremen (16)              | 3,60               | 3,53                            | 3,53                      | 3,58                             | 3,37                                |
| Rheinland-Pfalz/Saarland/NRW (9)       | 3,59               | 3,54                            | 3,55                      | 3,57                             | 3,36                                |
| Sachsen (8)                            | 3,71               | 3,61                            | 3,64                      | 3,67                             | 3,44                                |
| Sachsen-Anhalt (6)                     | 3,65               | 3,59                            | 3,64                      | 3,66                             | 3,53                                |
| Schleswig-Holstein/Hamburg (4)         | 3,71               | 3,31                            | 3,57                      | 3,62                             | 3,45                                |
| Thüringen (6)                          | 3,63               | 3,49                            | 3,65                      | 3,63                             | 3,49                                |
| insgesamt                              | 3,61               | 3,51                            | 3,52                      | 3,56                             | 3,39                                |

tifizierung wird für die Patientinnen ein Netzwerk gebildet, in dem alle medizinischen Fachdisziplinen und vor allem Berufsgruppen transsektoral zusammenarbeiten, damit den Patientinnen für jeden Bereich ihrer Erkrankung kompetente und vertrauensvolle Ansprechpartner zur Verfügung stehen. Spiegeln sich diese Voraussetzungen in den Erfahrungen der Patientinnen und damit in den Ergebnissen der Befragung wider?

Die Befragung erfolgte poststationär postalisch, der überwiegende Teil der Patientinnen befand sich somit in einem frühen Abschnitt der Gesamtbehandlung, lediglich 7,6% der Patientinnen hatten vor der Operation eine neoadjuvante Chemotherapie erhalten. Zusammenfassend waren 94,3% der Patientinnen mit ihrem Krankenhausaufenthalt zufrieden und würden ihr Zentrum weiterempfehlen.

Wenn man die Ergebnisse der Skalen und Items im Einzelnen betrachtet, sind vor allem das Vertrauen zu den Ärztinnen und Ärzten und dem Pflegepersonal besonders hervorzuheben. Die Patientinnen hatten vollstes Vertrauen zu dem Personal (97,3% Ärztinnen/Ärzte, 96,7% Pflege) und beurteilten es als sehr kompetent (98,4% Ärztinnen/Ärzte, 97,2% Pflege). Darüber hinaus gaben sie an, dass sie sich durch die Mitarbeiter unterstützt fühlten und ihnen damit der Umgang mit der Erkrankung leichter fiel (89,2% Ärztinnen/Ärzte, 93,7% Pflege). Auch mit den Erklärungen der Ärztinnen/Ärzte über ihre Erkrankung und die Vorteile und Risiken der gewählten Behandlung waren die Patientinnen sehr zufrieden, jedoch gaben 12,6% der Patientinnen an, dass sie nur wenig oder keine Informationen über verschiedene, im Sinne von alternativen, Behandlungsmöglichkeiten erhalten hätten. Dieser Umstand ist wahrscheinlich darauf zurückzuführen, dass für den überwiegenden Teil der befragten Patientinnen aufgrund der klinischen Befunde die Behandlungsschritte einem standardisierten Vorgehen folgen, so erhielten beispielsweise 74,5% der Patientinnen eine brusterhaltende Therapie. Darüber hinaus hätten sich über ein Drittel der Patientinnen mehr Informationen über allgemeine gesundheitsfördernde Maßnahmen und die aufgrund der Erkrankung und Therapie auftretenden körperlichen und nervlichen Belastungen im Alltag gewünscht.

Bemerkenswert ist zudem, dass für 35,8% der Befragten die Zertifizierung zum Brustkrebszentrum eine maßgebliche Rolle bei der Auswahl der Klinik gespielt hat. Bei 59,4% der Patientinnen erfolgte eine Empfehlung durch den Frauenarzt/die Frauenärztin. Die Bedeutung von niedergelassenen Ärzten als Empfehlungsgeber und in geringerem Maße von Zertifizierungen als Auswahlkriterium für Patienten wurde auch von Lux und Kollegen hervorgehoben [5]. Dies hängt sicherlich auch mit der vergleichsweise hohen Bekanntheit mit dem Konzept der zertifizierten Brustkrebszentren zusammen [6].

Die Information über bzw. Kontaktaufnahme mit anderen Berufsgruppen und Organisationen, die in dem Netzwerk der zertifizierten Zentren integriert sind, wird durch die Patientinnen unterschiedlich bewertet. So hätten sich 31% der Patientinnen mehr Informationen über Rehabilitationsmöglichkeiten gewünscht, die vor allem über die Sozialarbeiter eines Zentrums vermittelt werden. Etwa 18% der Patientinnen gaben an, dass sie nicht genug Informationen über eine mögliche psychoonkologische Betreuung bekommen haben und ca. 11% der Patientinnen waren mit der psychoonkologischen Betreuung, die sie erhalten haben, eher unzufrieden. Auch die Information über Selbsthilfegruppen ist nicht für alle Patientinnen erfolgt, 28% der Patientinnen wurden nicht über Selbsthilfegruppen informiert, wobei auch hier der Zeitpunkt der Befragung ausschlaggebend sein kann.

Ein weiterer wichtiger Baustein innerhalb der zertifizierten Zentren ist die Organisation der interdisziplinären Zusammenarbeit, also die Ablaufprozesse innerhalb des Netzwerks. Während die Organisation der Aufnahme in das Zentrum von den Patientinnen als gut empfunden wird, entstehen sowohl bei der Aufnahme als auch bei den Untersuchungen und Eingriffen häufig Wartezeiten (24,3%). Als sehr positiv wird die Entlassung aus dem Krankenhaus bewertet, also die Erläuterung der weiteren Behandlungsschritte (93,8% der Patientinnen) und die Vorbereitung der weiteren interdisziplinären Behandlung (90,8%).

Nicht in die Befragung eingeschlossen wurden die DKG-zertifizierten Brustkrebszentren Nordrhein-Westfalens, sofern diese auch nach den Anforderungen des Landes NRW zertifiziert waren und an einer Befragung mit fast identischem Fragebogen teilnahmen. Diese Befragung überschneidet sich mit der hier vorgestellten Studie. Ein Vergleich der Ergebnisse beider Befragungen ist für eine Reihe von Indikatoren eingeschränkt möglich, da mögliche Unterschiede auch mit den verschiedenen Befragungszeiträumen oder den unterschiedlich langen Fragebogen zusammenhängen könnten. Dieser Vergleich und die Untersuchung der patientenseitigen Gewichtung einzelner Aspekte könnten Gegenstand weiterführender Untersuchungen sein. Potenzial ergibt sich außerdem für Zusammenhangsanalysen, beispielsweise dem Zusammenhang zwischen der Zufriedenheit und der Primärfallzahl oder den Ergebnissen der Schlüsselpersonenbefragung [7].

Zusammenfassend lässt sich feststellen, dass die Befragung der Patientinnen in den Brustkrebszentren zeigt, dass die Voraussetzungen und Inhalte der zertifizierten Zentren, die in der Definition des Nationalen Krebsplans zusammengeführt sind, sehr gut in dem Alltag der Zentren abgebildet werden. Die Betreuung der Patientinnen erfolgt auf einem sehr hohen Niveau und das spiegelt sich in den insgesamt sehr guten Ergebnissen wider. Es gibt jedoch, wie aufgezeigt, auch Bereiche, in denen sowohl für die einzelnen Zentren als auch für die Gesamtheit der Zentren noch Verbesserungspotenziale bestehen. Die Unterschiede in den Ergebnissen zwischen den einzelnen Zentren sind teilweise beträchtlich und gerade hier sind die Einzelauswertungen, welche die Zentren erhalten haben, ein wichtiges Instrument, um Stärken und Schwächen innerhalb des eigenen Netzwerks zu identifizieren und innerhalb der Steuerungsgremien des Zentrums zu diskutieren. Damit können im Sinne der Patientinnen anhand eines klassischen PDCA-Zyklus Abläufe und Strukturen kritisch überprüft und bei Notwendigkeit angepasst werden. Zusätzlich wurde vonseiten der Deutschen Krebsgesellschaft in Zusammenarbeit mit der Frauenselbsthilfe nach Krebs und dem Institut für Medizinsoziologie, Versorgungsforschung und Rehabilitationswissenschaft (IMVR) nach Abschluss der Befragung ein Workshop für die Vertreter der Zentren durchgeführt, in dem die Inhalte und Ergebnisse der Befragung aufgearbeitet wurden. In diesem Rahmen stellten die Zentren mit besonders guten Ergebnissen für ausgewählte Themengebiete ihre Erfahrungen und Strukturen vor, die dann gemeinsam diskutiert werden, um im Sinne eines Benchmarkings von dem Vorgehen Anderer lernen zu können.

### Fazit für die Praxis

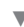

Die Auswertung der Befragung zeigt, dass die Ziele und Inhalte zertifizierter Zentren, wie sie in der Definition des Nationalen Krebsplans zusammengefasst sind, durch die Zentren sehr gut

umgesetzt werden. Die interdisziplinäre, berufsgruppenübergreifende und transsektorale Zusammenarbeit der beteiligten Partner spiegelt sich in dem Erleben der Patientinnen und damit in den Ergebnissen der Befragung wider. Die Patientinnen werden in den zertifizierten Brustkrebszentren sehr gut betreut, was an einer Reihe von Einzelaspekten deutlich wird. Besonders positiv wird die Unterstützung durch bzw. das Vertrauen in die Ärztinnen/Ärzte und das Pflegepersonal beurteilt, die den Patientinnen den Umgang mit der Erkrankung erleichtern, ihnen zuhören und auf die sich die Patientinnen verlassen. Verbesserungspotenziale zeigen sich für eine Reihe von in der Befragung erhobener Aspekte, unter anderem für den in dieser Arbeit vorgestellten Bereich der Information. Zutage treten zudem teilweise deutliche Unterschiede zwischen den Brustkrebszentren. Regionale Unterschiede sind kaum auszumachen. Die Ergebnisdarstellung im Ergebnisbericht des Einzelzentrums ermöglicht die Analyse von Stärken und Schwächen des eigenen Brustkrebszentrums im Vergleich zu den übrigen Brustkrebszentren und kann von den Brustkrebszentren genutzt werden, um gezielt Maßnahmen im Sinne eines „lernenden Krankenhauses“ einzuleiten. Die in den Jahren zuvor in Nordrhein-Westfalen gemachten Erfahrungen zeigen, dass die Ergebnisse der Befragung erfolgreich genutzt werden können und im Zeitverlauf Verbesserungen zu beobachten sind [8]. Das Ziel für jedes einzelne Brustkrebszentrum sollte es dabei sein, die Ergebnisse zu verbessern. Aus Sicht der Patientinnen ist es zudem bedeutsam, dass sich dabei die Unterschiede zwischen den Häusern verringern und sowohl die Qualität der medizinischen Versorgung als auch die Patientenorientierung flächendeckend auf höchstem Niveau sind [9].

## Danksagung

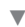

Wir danken der Firma AVON für die großzügige Förderung der Studie und den Brustkrebszentren sowie den Patientinnen und Patienten für die rege Teilnahme an der Befragung.

## Interessenkonflikt

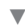

Nein.

## Literatur

- 1 Kowalski C, Nitzsche A, Scheibler F et al. Breast cancer patients' trust in physicians: The impact of patients' perception of physicians' communication behaviors and hospital organizational climate. *Pat Educ Couns* 2009; 77: 344–348
- 2 Dillman DA. *Mail and Telephone Survey: the total Design Method*. New York: Wiley & Sons; 1978
- 3 Pfaff H. Das lernende Krankenhaus. *Z f Gesundheitswiss* 1997; 5: 323–342
- 4 [http://www.bmg.bund.de/fileadmin/dateien/Downloads/N/Nationaler\\_Krebsplan/Zielpapier5\\_Nationaler\\_Krebsplan\\_onkologische\\_Versorgungsstrukturen\\_110623.pdf](http://www.bmg.bund.de/fileadmin/dateien/Downloads/N/Nationaler_Krebsplan/Zielpapier5_Nationaler_Krebsplan_onkologische_Versorgungsstrukturen_110623.pdf); Stand: 14.07.2011
- 5 Lux MP, Fasching PA, Schrauder M et al. The era of centers: the influence of establishing specialized centers on patients' choice of hospital. *Arch Gynecol Obstet* 2011; 283: 559–568
- 6 Lux MP, Fasching PA, Bani MR et al. Marketing von Brust- und Perinatalzentren – Sind Patientinnen mit dem Produkt „zertifiziertes Zentrum“ vertraut? *Geburtshilfe und Frauenheilkunde* 2009; 69: 321–327
- 7 Kowalski C, Wesselmann S, Ansmann L et al. Key informants' perspectives on accredited breast cancer centres: results of a survey. *Geburtsh Frauenheilk* 2012; 72: 135–141
- 8 Kowalski C, Würstlein R, Steffen P et al. Vier Jahre Patientinnenbefragung im Rahmen der (Re-)Zertifizierung der Brustzentren in Nordrhein-Westfalen. *Geburtsh Frauenheilk* 2011; 71: 67–72
- 9 Selby JV, Schmittiel JA, Lee J et al. Meaningful variation in performance: What does variation in quality tell us about improving quality? *Medical Care* 2010; 48: 133–139
